# Supplementary material
Source: PubMed Central journal article supplement (PMC4704605)
Supplement: supp_pp.15.01661_PP2015-01661R1_Supplemental_Material.pdf [file supp_pp.15.01661_PP2015-01661R1_Supplemental_Material.pdf]

**Table 1.** Presence (+) or absence (-) of Glyma.01G165800-D (*Rj4*) in 48 soybean genotypes.

| PI #      | Species       | Origin    | Phenotype | <i>Rj4</i> | PI #      | Species        | Origin  | Phenotype | <i>Rj4</i> |
|-----------|---------------|-----------|-----------|------------|-----------|----------------|---------|-----------|------------|
| PI548654  | <i>G. max</i> | USA       | Nod-      | +          | PI 157469 | <i>G. max</i>  | Japan   | Nod+      | -          |
| PI548631  | <i>G. max</i> | USA       | Nod+      | -          | PI 209340 | <i>G. max</i>  | Japan   | Nod+      | -          |
| PI 69533  | <i>G. max</i> | China     | Nod-      | +          | PI 200522 | <i>G. max</i>  | Japan   | Nod+      | -          |
| PI 70241  | <i>G. max</i> | China     | Nod-      | +          | PI 548666 | <i>G. max</i>  | USA     | Nod+      | -          |
| PI 80461  | <i>G. max</i> | Japan     | Nod-      | +          | PI 548559 | <i>G. max</i>  | USA     | Nod+      | -          |
| PI 82246  | <i>G. max</i> | Korea     | Nod-      | +          | PI540556  | <i>G. max</i>  | USA     | Nod+      | -          |
| PI 84668  | <i>G. max</i> | Korea     | Nod-      | +          | PI 553039 | <i>G. max</i>  | USA     | Nod+      | -          |
| PI 85666  | <i>G. max</i> | Japan     | Nod-      | +          | PI 165673 | <i>G. max</i>  | China   | Nod+      | -          |
| PI 86026  | <i>G. max</i> | Japan     | Nod-      | +          | PI 60272  | <i>G. max</i>  | China   | Nod+      | -          |
| PI 86454  | <i>G. max</i> | Japan     | Nod-      | +          | PI 54818  | <i>G. max</i>  | China   | Nod-      | +          |
| PI 91729  | <i>G. max</i> | Korea     | Nod-      | +          | PI 548489 | <i>G. max</i>  | China   | Nod+      | -          |
| PI 227327 | <i>G. max</i> | Japan     | Nod-      | +          | PI 548480 | <i>G. max</i>  | China   | Nod-      | +          |
| PI 291312 | <i>G. max</i> | China     | Nod-      | +          | PI 71570  | <i>G. max</i>  | China   | Nod-      | +          |
| PI 71558  | <i>G. max</i> | China     | Nod-      | +          | PI 86078  | <i>G. max</i>  | Japan   | Nod+      | -          |
| PI 192869 | <i>G. max</i> | Indonesia | Nod-      | +          | PI 548472 | <i>G. max</i>  | China   | Nod+      | -          |
| PI 331793 | <i>G. max</i> | Vietnam   | Nod-      | +          | PI 518671 | <i>G. max</i>  | USA     | Nod+      | -          |
| PI 379623 | <i>G. max</i> | Japan     | Nod-      | +          | PI 479744 | <i>G. soja</i> | China   | Nod-      | +          |
| PI 181699 | <i>G. max</i> | Suriname  | Nod-      | +          | PI 468916 | <i>G. soja</i> | China   | Nod-      | +          |
| PI 205910 | <i>G. max</i> | Thailand  | Nod-      | +          | PI 407025 | <i>G. soja</i> | Japan   | Nod-      | +          |
| PI 281898 | <i>G. max</i> | Malaysia  | Nod-      | +          | PI 101404 | <i>G. soja</i> | China   | Nod-      | +          |
| PI 547895 | <i>G. max</i> | USA       | Nod-      | +          | PI 507785 | <i>G. soja</i> | Russian | Nod+      | -          |
| PI 518668 | <i>G. max</i> | USA       | Nod-      | +          | PI 366121 | <i>G. soja</i> | Japan   | Nod+      | -          |
| PI 230974 | <i>G. max</i> | Japan     | Nod+      | -          | PI 245331 | <i>G. soja</i> | Taiwan  | Nod-      | +          |
| PI 548447 | <i>G. max</i> | China     | Nod-      | +          | PI 366122 | <i>G. soja</i> | Japan   | Nod-      | +          |

Nod+ means the plant can nodulate with USDA61; Nod- indicates that the plant can't nodulate with the strain.
